# Supplementary material for: SARS-CoV-2 and its ORF3a, E and M viroporins activate inflammasome in human macrophages and induce of IL-1α in pulmonary epithelial and endothelial cells
Source: Cell Death Discov. 2024 Apr 25;10:191. doi: 10.1038/s41420-024-01966-9 (PMC11045860; doi:10.1038/s41420-024-01966-9)

**SARS-CoV-2 and its ORF3a, E and M viroporins activate inflammasome in human macrophages and induce of IL-1 $\alpha$  in pulmonary epithelial and endothelial cells**

Magdalena Ambrożek-Latecka<sup>1</sup>, Piotr Kozłowski<sup>2</sup>, Grażyna Hoser<sup>1</sup>, Magdalena Bandyszewska<sup>1</sup>, Karolina Hanusek<sup>3</sup>, Dominika Nowis<sup>4</sup>, Jakub Gołąb<sup>4</sup>, Małgorzata Grzanka<sup>3</sup>, Agnieszka Piekiełko-Witkowska<sup>3</sup>, Luise Schulz<sup>5</sup>, Franziska Hornung<sup>5</sup>, Stefanie Deinhardt-Emmer<sup>5</sup>, Ewa Kozłowska<sup>6</sup>, Tomasz Skirecki<sup>1\*</sup>

**Supplementary results**

**Supplementary Figure 1. NLRP3 inflammasome is engaged in IL- $\beta$  and gasdermin D maturation upon SARS-CoV-2 viroporin expression.** Densitometric analysis of Western blots from U937 WT and U937 NLRP3 KO cells transfected with lentiviral particles carrying ORF3A, E and M proteins. A. IL-1  $\beta$ . B. Gasdermin D (GSDMD). Graphs represent means  $\pm$  SEM, n=3. Multiple comparisons were performed with two-way ANOVA test. \*\*\*\*p<0.0001.

**A**

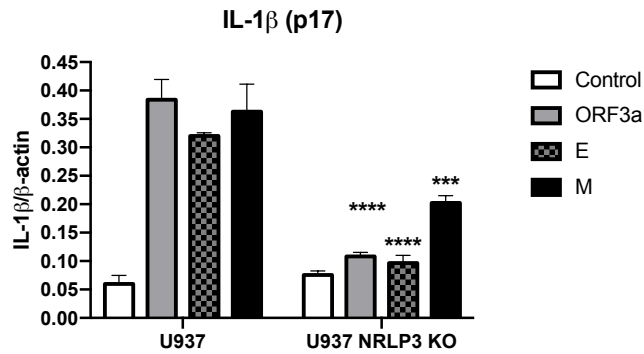

**B**

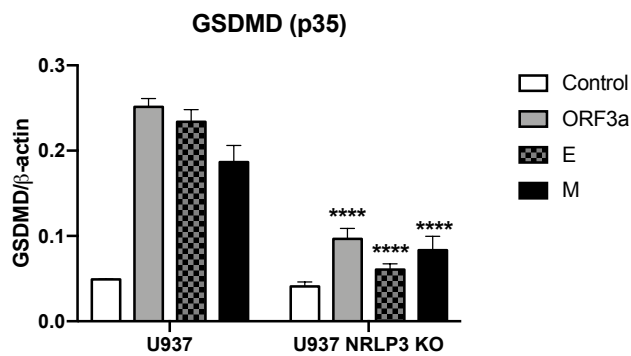

## Supplementary Figure 2. Validation of the novel inflammasome reporter cell lines.

Immortalized cell lines expressing the ASC::GFP protein were stimulated with LPS and nigericin. A. human bronchial epithelial cells -3 KT cell line. B. human umbilical vein endothelial cells/TERT cell line.

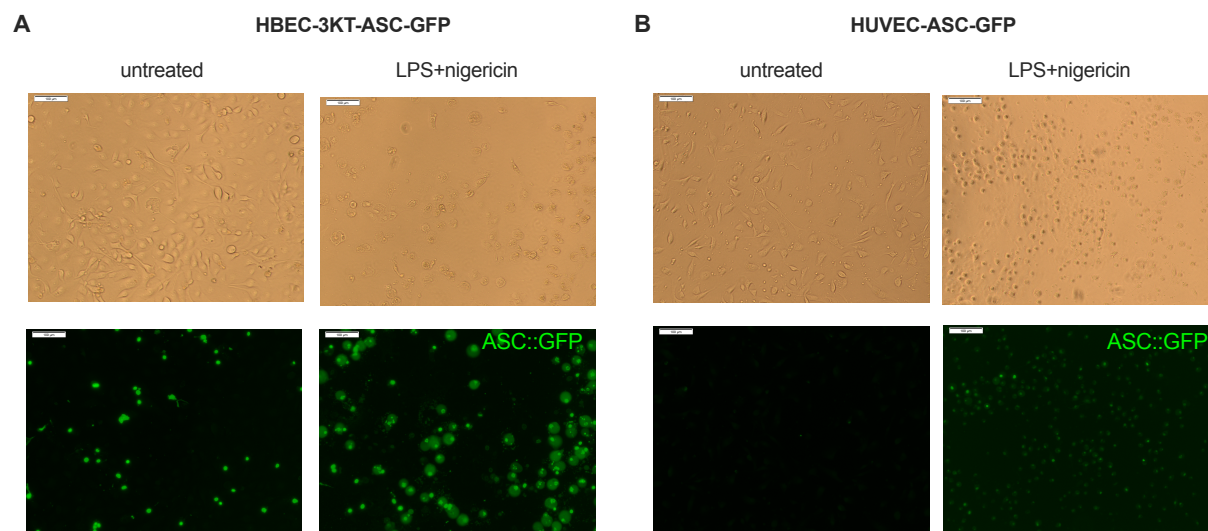

**Supplementary Figure 3. Analysis of the activation of apoptotic caspases in human pulmonary epithelial cells and human pulmonary microvascular endothelium by the viroporins**

**A.** Activation of caspase-3/7 in HPAEpiCs by the viroporins; representative pictures (left) and fluorometric readouts (right) are shown. **F.** Activation of caspase-3/7 in HPMECs by the viroporins; representative pictures (left) and fluorometric readouts (right) are shown. Graphs represent means  $\pm$  SEM, n=3-4. Two groups comparisons were analyzed with t-test. Multiple comparisons were performed with two-way ANOVA test. \*p<0.05.

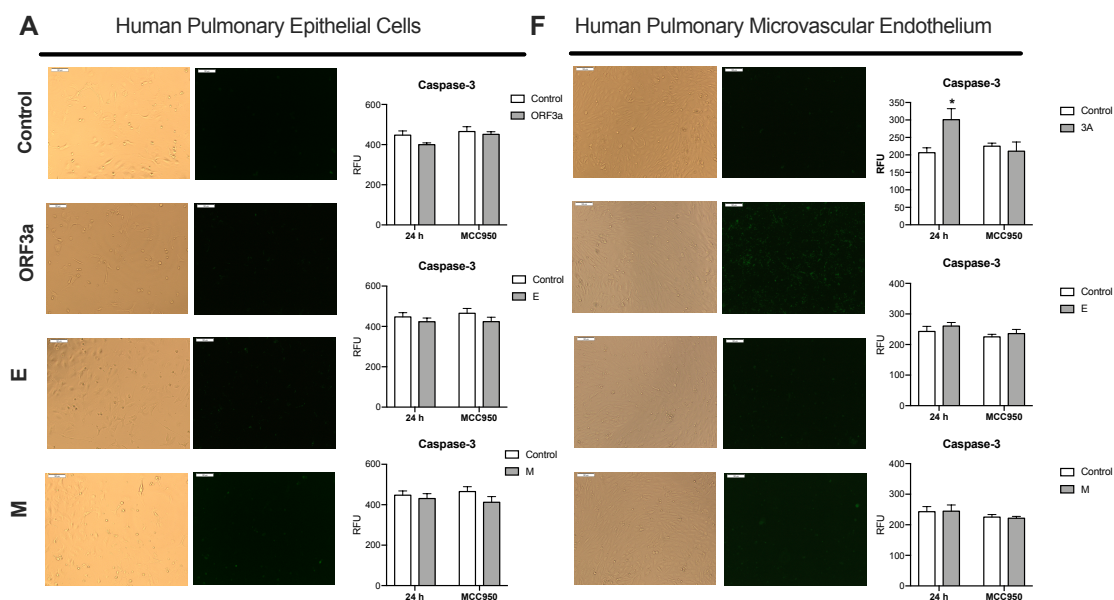

Supplement: Supplementary file 1 — Supplementary Material [file 41420_2024_1966_MOESM1_ESM.pdf]
